# Supplementary material
Source: publisher site journal article supplement (https://www.dovepress.com/get_supplementary_file.php?f=427557.docx)
Supplement: Supplementary file 1 [file get_supplementary_file.php]

**Table S1.** The Hardy-Weinberg equilibrium of *GSTM1*(rs1056806), *SOD2* (rs4880), *NOS1* (rs1047735), *NOS3* (rs1800779) and *ADORA2A* (rs2298383)

| SNP | Group | *χ2* | *p* |
| --- | --- | --- | --- |
| *GSTM1*(rs1056806) | TD | 0.90 | 0.341 |
|  | non-TD | 2.17 | 0.141 |
|  | ALL | 3.07 | 0.079 |
| *SOD2* (rs4880) | TD | 0.01 | 0.906 |
|  | non-TD | 0.76 | 0.382 |
|  | ALL | 0.39 | 0.534 |
| *NOS1* (rs1047735) | TD | 1.81 | 0.179 |
|  | non-TD | 0.46 | 0.497 |
|  | ALL | 0.01 | 0.903 |
| *NOS3* (rs1800779) | TD | 0.62 | 0.429 |
|  | non-TD | 0.18 | 0.671 |
|  | ALL | 0.06 | 0.942 |
| *ADORA2A* (rs2298383) | TD | 0.05 | 0.828 |
|  | non-TD | 1.05 | 0.304 |
|  | ALL | 1.18 | 0.278 |

**Notes:** TD, tardive dyskinesia; non-TD, without tardive dyskinesia; All,216 schizophrenic patients.

**Table S2.** GMDR models of gene-gene interactions and TD risk

| Best model | Training accuracy (%) | Testing accuracy (%) | Sign test  (*p-value*) | *CVC* |
| --- | --- | --- | --- | --- |
| rs1047735 | 55.94 | 51.28 | 5(0.62) | 8/10 |
| rs1047735 rs2298383 | 61.48 | 49.72 | 3(0.95) | 5/10 |
| rs1056806 rs1047735 rs2298383 | 69.32 | 59.35 | 9(**0.01**) | 10/10 |

**Notes:** CVC, Cross-validation Consistency；Bolding represents P<0.05.

**Table S3.** Interaction analysis between the best genetic model and AIMS total score

| genotype combination | Frequency（%） | *p* | *OR* (95%*CI*) |
| --- | --- | --- | --- |
| CCAATC | 17(7.87) | 0.193 | 1.739(-0.886-4.364) |
| CCAACC | 7(3.24) | 0.340 | -1.556(-4.765-1.654) |
| CCAGTT | 23(10.64) | 0.556 | 0.749(-1.755-3.252) |
| CCAGTC | 39(18.06) | 0.920 | -0.12(-2.474-2.235) |
| CCAGCC | 21(9.72) | 0.666 | -0.556(-3.093-1.981) |
| CCGGTT | 17(7.87) | **0.021** | 3.092(0.466-5.717) |
| CCGGTC | 21(9.72) | 0.313 | 1.302(-1.235-3.839) |
| CCGGCC | 16(7.41) | 0.714 | -0.493(-3.146-2.16) |
| CTAATT | 2(0.93) | 0.442 | 1.944(-3.034-6.922) |
| CTAATC | 5(2.31) | 0.675 | -0.756(-4.307-2.796) |
| CTAACC | 4(1.85) | 0.539 | 1.194(-2.632-5.021) |
| CTAGTT | 3(1.38) | 0.918 | -0.222(-4.467-4.023) |
| CTAGTC | 13(6.02) | 0.193 | 1.829(-0.932-4.59) |
| CTAGCC | 7(3.24) | 0.331 | 1.587(-1.622-4.796) |
| CTGGTT | 6(2.78) | 0.536 | -1.056(-4.412-2.301) |
| CTGGTC | 5(2.31) | 0.675 | -0.756(-4.307-2.796) |
| CTGGCC | 1(0.46) | 0.111 | 5.444(-1.268-12.157) |
| CCAATT | 9(4.17) |  |  |

**Notes:** OR, odds ratio; 95% CI, 95% confidence interval; Bolding represents P<0.05.

**Table S4.** Comparison between the PANSS scores of *GSTM1*(rs1056806), *SOD2* (rs4880), *NOS1* (rs1047735), *NOS3* (rs1800779) and *ADORA2A* (rs2298383) genotype groups

| SNP | | *GSTM1* (rs1056806) | | *SOD2* (rs4880) | | *NOS1* (rs1047735) | | *NOS3* (rs1800779) | | *ADORA2A* (rs2298383) | |
| --- | --- | --- | --- | --- | --- | --- | --- | --- | --- | --- | --- |
| PANSS (score) | | F | P | F | P | F | P | F | P | F | P |
| P subscore | TD | 4.625 | **0.036** | 0.462 | 0.499 | 0.362 | 0.698 | 3.831 | 0.055 | 0.148 | 0.863 |
| non-TD | 2.658 | 0.105 | 0.042 | 0.837 | 2.539 | 0.082 | 0.150 | 0.699 | 0.201 | 0.818 |
| N subscore | TD | 0.008 | 0.931 | 1.39 | 0.243 | 1.535 | 0.224 | 0.015 | 0.408 | 0.184 | 0.832 |
| non-TD | 1.589 | 0.209 | 0.012 | 0.913 | 0.479 | 0.620 | 0.528 | 0.469 | 0.765 | 0.467 |
| G subscore | TD | 1.200 | 0.278 | 0.966 | 0.330 | 0.538 | 0.587 | 6.291 | **0.015** | 1.073 | 0.349 |
| non-TD | 3.110 | 0.080 | 0.151 | 0.698 | 0.675 | 0.511 | 0.546 | 0.461 | 0.846 | 0.431 |
| PANSS total score | TD | 1.497 | 0.226 | 1.867 | 0.177 | 1.296 | 0.282 | 3.756 | 0.058 | 0.689 | 0.506 |
| non-TD | 4.104 | **0.044** | 0.001 | 0.987 | 0.352 | 0.704 | 0.273 | 0.602 | 0.340 | 0.712 |

TD, tardive dyskinesia; non-TD, without tardive dyskinesia. PANSS, Positive and Negative Syndrome Scale; P, positive symptom; N, Negative symptom; G, General symptom; Bolding represents P<0.05.

**Table S5.** Comparison between the RBANS scores of *GSTM1* (rs1056806), *SOD2* (rs4880), *NOS1* (rs1047735), *NOS3* (rs1800779) and *ADORA2A* (rs2298383) genotype groups

| SNP | | *GSTM1* (rs1056806) | | *SOD2* (rs4880) | | *NOS1* (rs1047735) | | *NOS3* (rs1800779) | | *ADORA2A* (rs2298383) | |
| --- | --- | --- | --- | --- | --- | --- | --- | --- | --- | --- | --- |
| RBANS (score) | | *F* | *p* | *F* | *p* | *F* | *p* | *F* | *p* | *F* | *p* |
| Immediate memory | TD | 0.14 | 0.705 | 0.38 | 0.539 | 0.71 | 0.496 | 2.37 | 0.129 | 0.95 | 0.393 |
| non-TD | 0.16 | 0.690 | 0.06 | 0.804 | 0.88 | 0.417 | 0.65 | 0.422 | 1.51 | 0.225 |
| Visuospatial/constructional | TD | 0.59 | 0.448 | 0.80 | 0.376 | 1.70 | 0.192 | 0.96 | 0.332 | 2.16 | 0.125 |
| non-TD | 0.01 | 0.907 | 0.07 | 0.799 | 2.65 | 0.075 | 0.41 | 0.525 | 0.90 | 0.408 |
| Language | TD | 0.02 | 0.891 | 0.02 | 0.877 | 3.53 | **0.034** | 2.63 | 0.110 | 0.43 | 0.652 |
| non-TD | 0.80 | 0.372 | 0.51 | 0.479 | 1.50 | 0.226 | 0.22 | 0.642 | 0.36 | 0.697 |
| Attention | TD | 0.07 | 0.790 | 0.79 | 0.377 | 1.90 | 0.159 | 1.93 | 0.171 | 3.37 | **0.041** |
| non-TD | 2.04 | 0.155 | 1.03 | 0.312 | 0.81 | 0.449 | 0.01 | 0.927 | 0.78 | 0.463 |
| Delayed memory | TD | 0.22 | 0.638 | 0.01 | 0.927 | 2.39 | 0.101 | 0.08 | 0.773 | 2.75 | 0.073 |
| non-TD | 1.36 | 0.246 | 0.08 | 0.781 | 1.68 | 0.190 | 2.66 | 0.105 | 0.78 | 0.459 |
| total | TD | 0.56 | 0.459 | 0.27 | 0.608 | 2.36 | 0.103 | 1.12 | 0.295 | 3.46 | **0.038** |
| non-TD | 0.12 | 0.726 | 0.54 | 0.462 | 1.79 | 0.171 | 0.20 | 0.660 | 0.82 | 0.442 |

TD, tardive dyskinesia; non-TD, without tardive dyskinesia. RBANS: Repeatable Battery for the Assessment of Neuropsychological Status; Bolding represents P<0.05.
